# Supplementary material
Source: PubMed Central journal article supplement (PMC522798)
Supplement: 7600399s1.pdf [file 7600399s1.pdf]

Supplemental Figure 1, Medina et al.

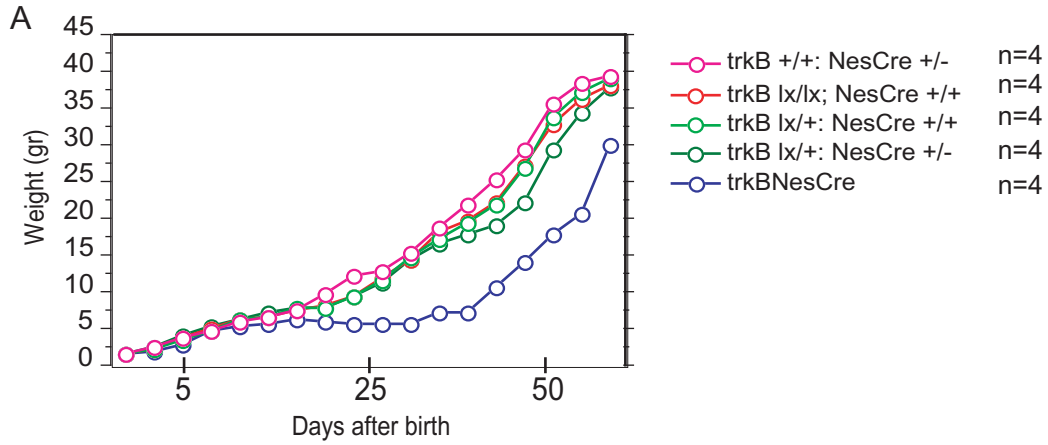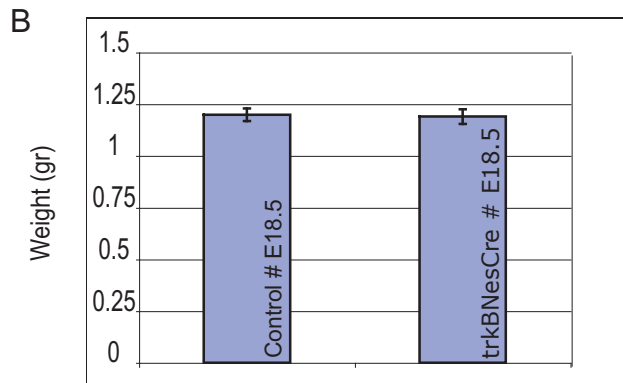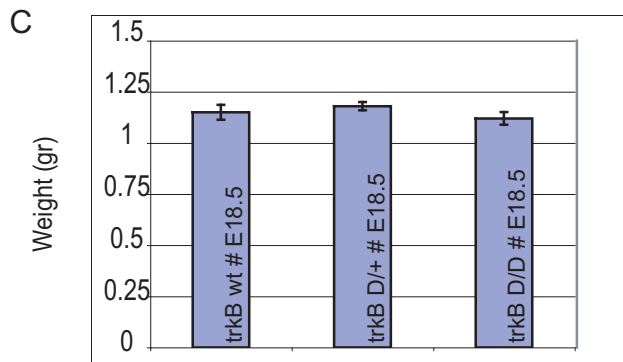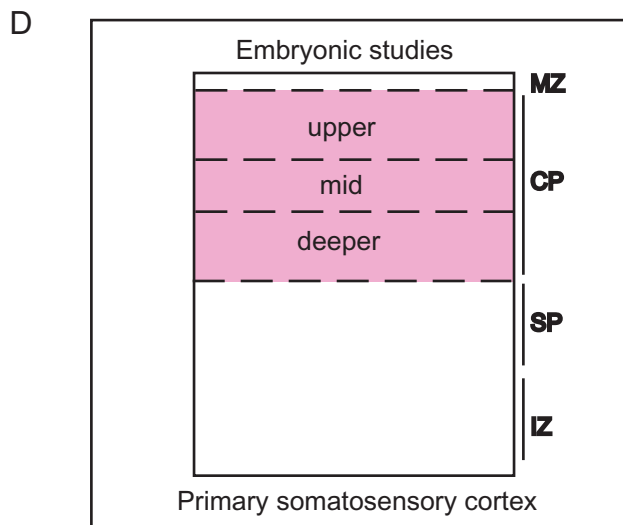

## Figure Legend

Supplemental Figure 1. Growth analysis of different *trkB* mutant mice, and cortical counting methodology

A) Body weight of *trkBNesCre* and control mice was measured at birth and then every two days until 10 weeks of age. Note that all the genotypes presented grew at the same rate until P21, after which time the growth of *trkBNesCre* mice was retarded. In B) and C) the body weight of *trkBNesCre* and *trkB<sup>D/D</sup>* E18.5 embryos and their control littermates were not found to differ (n= 3 or 4 per genotype).

(D) Cortical counting methodology used for the embryonic studies.

The quantitative distribution of BrdU-positive cells in the cerebral cortex was determined from photomicrographs covering cortical layers of the somatosensory area. BrdU-positive cells were counted in an area of 400 X 500  $\mu\text{m}$  (colored pink in D) that was divided into three regions: upper, mid, and deeper layers of the cortical plate (CP) (3 animals per condition, 10 images each). All pictures were location-matched between mutant mice and their littermate controls. MZ, marginal zone; SP, subplate; IZ, intermediate zone.
