# Supplementary material
Source: PubMed Central journal article supplement (PMC522798)
Supplement: 7600399s2.pdf [file 7600399s2.pdf]

Supplemental Figure 2, Medina et al.

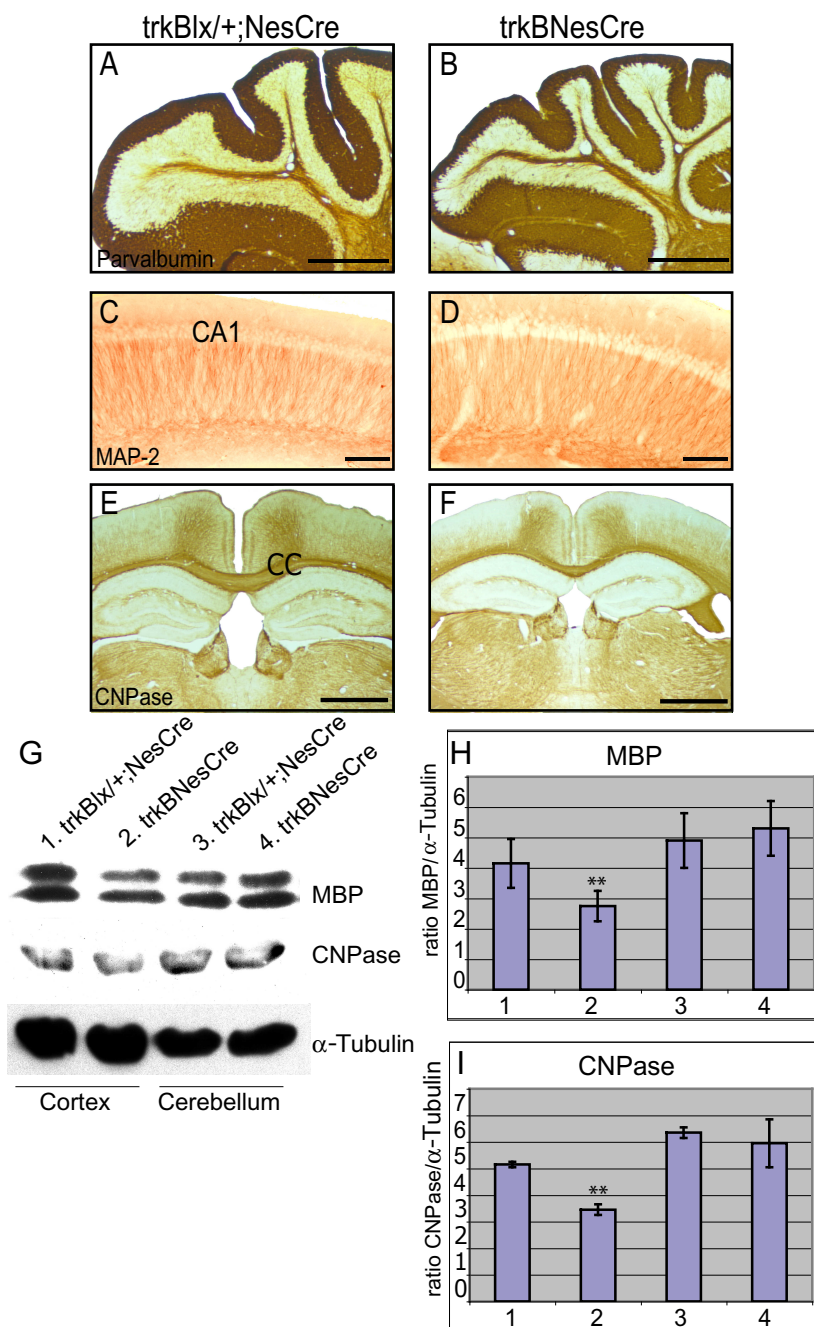

## Figure Legend

Supplemental Figure 2. Further histological analysis of the *trkB<sup>NesCre</sup>* brains

(A-F). Sagittal sections from the cerebellum of control and mutant mice (A, and B respectively) stained with anti-parvalbumin antibodies. Note similar parvalbumin staining in *trkB<sup>NesCre</sup>* and control mice. (C-D) MAP-2 immunostaining of the hippocampal CA1 region reveals normal dendritic differentiation in control (C) and *trkB<sup>NesCre</sup>* mutant mice (D). (E-F) CNPase immunostaining of coronal brain sections from control (E) and *trkB<sup>NesCre</sup>* mice (F) showing a dramatic reduction of CNPase staining in the mutant mice (F). Also note the reduction in size of the corpus callosum (CC) in the *trkB<sup>NesCre</sup>* brain (F) compared to controls (E). (G) Expression analysis of myelin proteins in *trkB<sup>NesCre</sup>* mice. Cell lysates from cortex and cerebellum of control and *trkB<sup>NesCre</sup>* mice at P60-90 were either immunoblotted with anti-MBP (G, upper panel), or anti-CNPase antibodies (G, mid panel). To control for differences in protein loading, blots were stripped and reprobed with anti- $\alpha$ Tubulin antibodies (G, lower panel). (H) Densitometric analyses of MBP protein levels in either the cortex (lanes 1-2) or cerebellum (lanes 3-4) of control and *trkB<sup>NesCre</sup>* mice revealed a significant reduction in the expression levels of MBP protein in the cortex of *trkB<sup>NesCre</sup>* mice (H, lane 2), \*\*,  $p=0.004$ . By contrast MBP expression in the cerebellum of control and *trkB<sup>NesCre</sup>* mice were comparable (H, lanes 3 and 4),  $p=0.4$ . (I) Similar analysis for CNPase protein levels in either the cortex (lanes 1-2) or cerebellum (lanes 3-4) of control and *trkB<sup>NesCre</sup>* mice showed a significant reduction in the expression of CNPase protein in the cortex of *trkB<sup>NesCre</sup>* mice (I, lane 2), \*\*,  $p=0.01$ . Conversely, CNPase protein levels in the cerebellum of control and *trkB<sup>NesCre</sup>* mice were similar (I, lanes 3 and 4),  $p=0.6$ . Statistical analysis was performed with Student's t test. Scale bars: (A-B), 0.5mm; (C-D), 100 $\mu$ m; (E-F), 1mm.
