# Supplementary material
Source: PubMed Central journal article supplement (PMC522798)
Supplement: 7600399s3.pdf [file 7600399s3.pdf]

*Supplemental Figure 3, Medina et al.*

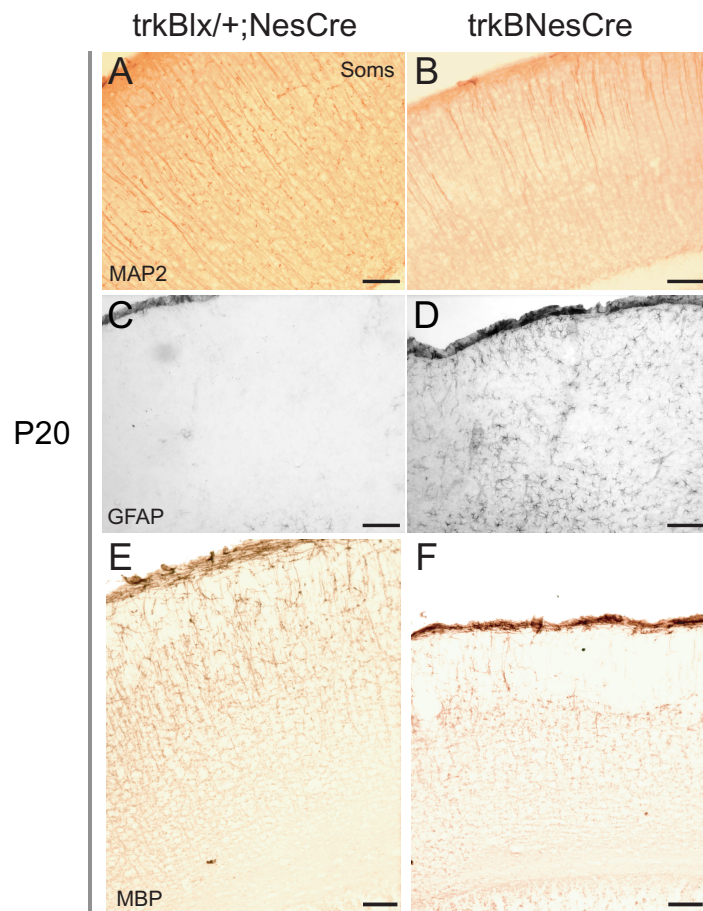

### Figure Legend

Supplemental Figure 3. Analysis of *trkB<sup>Nescre</sup>* brains at postnatal day 20 (P20).

(A-B) Somatosensory cortices (Soms) of controls and mutants immunostained with the MAP2 dendritic marker. Note that *trkB<sup>Nescre</sup>* mutants at this stage already show impaired dendritic differentiation. (C-D) Astrogliosis is also apparent in *trkB<sup>Nescre</sup>* Soms at P20, as revealed by GFAP immunostaining; compare (D) with (C). (E-F) Decreased staining is observed in P20 Soms cortex of *trkB<sup>Nescre</sup>* mutants by MBP immunostaining (F) compared to control mice (E). Soms, (Somatosensory cortex). Scale bars: (A-D), 100 $\mu$ m; (E-F), 50  $\mu$ m.
