# Supplementary material
Source: PubMed Central journal article supplement (PMC522798)
Supplement: 7600399s4.pdf [file 7600399s4.pdf]

### **Antibodies used for the Biochemistry**

The specific antibodies used include: the anti-panTrk polyclonal antibody, C-14, (Santa Cruz, 1:50); anti-TrkB antiserum raised against the kinase domain of TrkB (113-5, 1:300), the anti-phosphotyrosine, 4G10 (monoclonal, New England Biolabs, 1:2000); a monoclonal anti-pMAPK antibody (clone E10, New England Biolabs, 1:2000); a monoclonal anti-Erk1 antibody (Zymed, 1:1000); and anti-pAKT and anti-AKT antibodies (New England Biolabs, 1:1000). The polyclonal anti-Gab1 (1:5000) antibody was raised against a glutathion S-transferase (GST)-Gab1 (amino acids 391-541, corresponding to the Met-binding domain of mouse Gab1) as antigen. Finally, the monoclonal antibodies anti-Synapsin I (SYSY; 1:10.000), anti-Vimentin (Sigma, 1:100), anti-neurofilament 200 (NF200; monoclonal, Chemicon, 1:400), anti- $\alpha$  tubulin (monoclonal, Sigma, 1:10.000), and anti-PLC $\gamma$  (monoclonal, New England Biolabs, 1:2000) were also used. For the anti-CNPase, anti-MAP2, and anti-parvalbumin antibodies see Histology.

### **Antibodies used for the Histology**

The specific antibodies used in these studies include: monoclonal antibodies against MAP2 (clone AP20, Chemicon international, Inc., 1:300), calbindin, and parvalbumin (Sigma, 1:400, and 1:1000, respectively), as well as antibodies against GFAP (polyclonal, SantaCruz; 1:100 and monoclonal, Sigma; 1:400), Reelin (monoclonal G10, gift from Dr. A. M. Goffinet), Calretinin (polyclonal, Swant; 1:2500), c-Fos (polyclonal, SantaCruz; 1:200), GAD67 (polyclonal, Chemicon; 1:1000), GABA (polyclonal, Sigma; 1: 1000), Glutamate (monoclonal, Sigma; 1:1000), S-100 (polyclonal, Sigma; 1:200), CNPase (monoclonal, Chemicon; 1:100), MBP (monoclonal, Chemicon; 1:200), MAB328 (monoclonal, Chemicon; 1:1000), NG2 (polyclonal, Chemicon; 1:200), and NeuN (monoclonal, Chemicon; 1:100).
